1  
2  
3  
4  
5  
6  
7  
8  
9  
10  
11  
12  
13  
14  
15  
16  
17  
18  
19  
20  
21  
22  
23  
24  
25  
26  
27  
28  
29  
30  
31  
32  
33  
34  
35  
36  
37  
38  
39  
40  
41

**Title: Immune Markers Are Associated with Cognitive Performance in a Multiethnic**

**Cohort: the Northern Manhattan Study**

Mitchell S. V. Elkind, MD, MS,<sup>1,2</sup> Michelle Moon, MS,<sup>1</sup> Tatjana Rundek, MD, PhD,<sup>3</sup> Clinton B.

Wright, MD, MS,<sup>4</sup> Ken Cheung, PhD,<sup>5</sup> Ralph L. Sacco, MD, MS,<sup>6</sup> Mady Hornig, MD<sup>2</sup>

<sup>1</sup> Department of Neurology, College of Physicians and Surgeons, Columbia University, New York, NY, USA

<sup>2</sup> Department of Epidemiology, Mailman School of Public Health, Columbia University, New York, NY, USA

<sup>3</sup> Department of Neurology, University of Miami, Miami, FL, USA

<sup>4</sup> National Institute of Neurological Disorders and Stroke, Bethesda, MD, USA

<sup>5</sup> Department of Biostatistics, Mailman School of Public Health, Columbia University, New York, NY, USA

<sup>6</sup> Department of Neurology, Miller School of Medicine, University of Miami, Miami, FL, USA

Running title: Immune markers and cognition

Abstract word count: 249, Word Count: 4138 words

Key words: Cognition; Cohort Studies; Epidemiology; Immune Function; Innate immunity; Vascular dementia

Corresponding author:

Mitchell Elkind, MD, MS  
Columbia University Irving Medical Center  
710 W. 168<sup>th</sup> St  
New York, New York, 10032  
Tel: 212-305-1710, Fax: 212-305-1658  
Email: [mse13@columbia.edu](mailto:mse13@columbia.edu)  
[Twitter: @mitchElkind](#)

Source of funding: NIH/NINDS R01 NS029993

42

43 Initially presented at American Academy of Neurology Annual Meeting May 2018.

44

45 Conflicts of Interest:

46 Dr. Elkind receives royalties from UpToDate for chapters on stroke and COVID-19.

47 Ms. Moon declares no conflicts of interest.

48 Dr. Cheung declares no conflicts of interest.

49 Dr. Sacco declares no conflict of interest.

50 Dr. Hornig declares no conflict of interest.

51 Dr. Rundek declares no conflict of interest.

52

53 **Immune Markers Are Associated with Cognitive Performance in a Multiethnic Cohort: the**  
54 **Northern Manhattan Study**

55 OBJECTIVE: To determine whether immune protein panels add significant information to  
56 correlates of cognition.

57 BACKGROUND: Immune mechanisms in vascular cognitive impairment and dementia are  
58 incompletely characterized.

59 DESIGN/METHODS: A subsample of the prospective Northern Manhattan Study underwent  
60 detailed neuropsychological testing. Cognitive scores were converted into Z-scores and  
61 categorized into four domains (memory, language, processing speed, and executive function)  
62 based on factor analysis. Blood samples were analyzed using a 60-plex immunoassay. We used  
63 least absolute shrinkage and selection operator (LASSO) procedures to select markers and their  
64 interactions independently associated with cognitive scores. Linear regression models assessed  
65 cross-sectional associations of known correlates of cognition with cognitive scores, and assessed  
66 model fit before and after addition of LASSO-selected immune markers.

67 RESULTS: Among 1179 participants (mean age  $70 \pm 8.9$  years, 60% women, 68% Hispanic),  
68 inclusion of LASSO-selected immune markers improved model fit above age, education, and  
69 other risk factors ( $p$  for likelihood ratio test  $< 0.005$  for all domains). C-C Motif Chemokine  
70 Ligand 11 (CCL 11, eotaxin), C-X-C Motif Chemokine Ligand 9 (CXCL9), hepatocyte growth  
71 factor (HGF), and serpin E1 (plasminogen activator inhibitor-1) were associated with each of the  
72 domains and with overall cognitive function. Immune marker effects were comparable to  
73 conventional risk factors: for executive function, each standard deviation (SD) increase in  
74 CCL11 was associated with an effect equivalent to aging three years; for memory, HGF had  
75 twice the effect of aging.

76 CONCLUSIONS: Immune markers associate with cognitive function in a multi-ethnic cohort.  
77 Further work is needed to validate these findings and determine optimal treatment targets.

78  
79

80  
81

82 **Non-standard Abbreviations and Acronyms**

83

|     |             |                                                         |
|-----|-------------|---------------------------------------------------------|
| 84  | 95%CI       | 95% confidence interval                                 |
| 85  | AD          | Alzheimer Disease                                       |
| 86  | CCL2        | C-C Motif Chemokine Ligand 2                            |
| 87  | CCL3        | C-C Motif Chemokine Ligand 3                            |
| 88  | CCL5        | C-C Motif Chemokine Ligand 5                            |
| 89  | CCL11       | C-C Motif Chemokine Ligand 11                           |
| 90  | CSF3        | Colony stimulating factor 3                             |
| 91  | CRP         | C-reactive protein                                      |
| 92  | CXCL9       | C-X-C Motif Chemokine Ligand 9                          |
| 93  | CXCL10      | C-X-C Motif Chemokine Ligand 10                         |
| 94  | HGF         | hepatocyte growth factor                                |
| 95  | IL12p40     | interleukin-12 p40                                      |
| 96  | IL1RA       | interleukin-1 receptor antagonist                       |
| 97  | LASSO       | Least Absolute Shrinkage and Selection Operator         |
| 98  | LRT         | likelihood ratio test                                   |
| 99  | MCI         | mild cognitive impairment                               |
| 100 | NOMAS       | Northern Manhattan Study                                |
| 101 | SCF         | stem cell factor                                        |
| 102 | sFasL       | soluble Fas ligand                                      |
| 103 | TNF $\beta$ | tumor necrosis factor $\beta$                           |
| 104 | TRAIL       | tumor necrosis factor-related apoptosis-inducing ligand |

105

106 **Introduction**

107           Communication between the brain and immune system is increasingly recognized as  
108 critical for brain health and neuroprotection after cerebrovascular, metabolic and microbial  
109 challenges.<sup>1,2,3,4</sup> Questions remain, however, regarding the role of inflammation in vascular and  
110 neurodegenerative mechanisms of cognitive decline, mild cognitive impairment (MCI) and  
111 dementia; the specific inflammatory pathways that are most important;<sup>5,6</sup> and the role of  
112 inflammation in populations, particularly Hispanics, with a high burden of vascular risk factors  
113 but that have been underrepresented in research.<sup>7,8,9</sup> Innate immunity, activation of complement  
114 and microglia, and humoral and cellular immunity may all contribute.<sup>10,11,12,13</sup> Much of this  
115 work, moreover, is based on preclinical models or small sample sizes in humans.

116           We hypothesized that a multiplex immunoassay measuring 60 immune molecules would  
117 provide insight into pathways involved in cognitive decline. We explored this hypothesis in a  
118 population-based cohort study, the Northern Manhattan Study (NOMAS), a sample of Hispanic  
119 and non-Hispanic participants from New York City.

120

121 **METHODS**

122 *Study Population*

123           NOMAS is a racially/ethnically diverse prospective cohort study consisting of 3,298  
124 stroke-free participants enrolled between 1993 and 2001. The study was initially designed to  
125 evaluate effects of medical, socio-economic, and vascular risk factors on incidence of stroke and  
126 other vascular outcomes. Eligible participants were individuals residing in northern Manhattan  
127 for  $\geq 3$  months in a household with a telephone, with no prior history of stroke, and age  $\geq 40$   
128 years old at the time of enrollment. Subjects were identified by random-digit dialing, and in-

129 person interview and assessment were conducted by trained bilingual research assistants. A  
130 subcohort of 1290 participants included 1091 subjects remaining clinically stroke-free from the  
131 original cohort as well as a sample of unrelated household members (n=199). MRI and detailed  
132 neuropsychological assessments were conducted, and blood samples were collected; methods of  
133 recruitment and characteristics of this sample have been described previously.<sup>14</sup> The study was  
134 approved by the Columbia University and University of Miami Institutional Review Boards, and  
135 all participants provided informed consent.

136

### 137 *Data collection*

138 Demographics and risk factors were collected through in-person interviews, as described  
139 previously.<sup>14</sup> Race-ethnicity was determined by self-identification. Insurance status was defined  
140 no insurance or Medicaid versus private insurance / Medicare<sup>23</sup>. Educational achievement was  
141 self-reported as number of years in school and degree achieved. Physical activity was evaluated  
142 by in-person questionnaire<sup>35</sup> and defined dichotomously. Smoking was categorized as current  
143 (within the past year), former, or never smoker of cigarettes, cigars or pipes. Standardized  
144 questions adapted from the Behavioral Risk Factor Surveillance System assessed hypertension  
145 and diabetes. Hypertension was defined either as participant self-report of hypertension, blood  
146 pressure measurement of 140/90 mmHg or greater, or use of anti-hypertensive medication.  
147 Diabetes was defined either as participant self-report of diabetes, fasting glucose of 126 mg/dL  
148 or greater, or use of insulin or oral anti-diabetic medications.

149

### 150 *Cognitive assessment*

151 Neuropsychological assessments were administered by trained bilingual research staff in  
152 English or Spanish, as previously described.<sup>15</sup> We developed cognitive domain-specific scores to  
153 enable interpretability of cognitive functions (Table e-1). Because of lack of population norms  
154 for older cohorts, we used baseline neuropsychological scores as our cohort norms.<sup>16</sup> To achieve  
155 comparability, neuropsychological tests were standardized against cohort-specific normative  
156 values. For timed tests (Color Trail 1, Color Trail 2 and Grooved Pegboard), because some  
157 participants did not complete tasks within the maximum time allowed, we calculated their new  
158 “imputed” time by adding penalty time to the maximum time allowed. The penalty time was  
159 obtained by multiplying the number of incomplete items by “expected time per correct items  
160 completed” estimated using Kaplan-Meier methods. The standardized scores for individual tests  
161 were then categorized into four key cognitive domains (memory, language, processing speed and  
162 executive function) based on an exploratory factor analysis and prior findings.<sup>16</sup> Thereafter,  
163 cognitive domain-specific scores were calculated by taking the mean of the individual  
164 standardized test scores selected for each domain. Cognitive outcomes were domain-specific z  
165 scores (memory, language, processing speed and executive function) at baseline and a composite  
166 cognitive function score obtained by averaging those four domain scores.

### 167 ***Multiplex immunoassay assessment***

168 We completed assays of 60 immune molecules in 1179 participants from stored fasting  
169 plasma drawn at the time of a detailed cognitive assessment.<sup>17,18</sup> We used a customized, highly  
170 multiplexed, magnetic bead-based immunoassay.<sup>19,20</sup> Our assay included molecules integral to  
171 inflammatory responses, reflecting relative activation of Th1 (pro-inflammatory), Th2 (counter-  
172 regulatory, autoimmunity-promoting), Th17 (innate mucosal anti-pathogen defenses, including  
173 in gut), T regulatory, B (antibody-producing) and NK cells, and, more generally, innate and

174 adaptive (memory) arms of the immune system; chemoattractants (chemokines); growth factors  
175 (including those vital to vascular remodeling); neurotrophic factors; cell adhesion markers; and  
176 adipokines.

177 Plasma samples were coded, randomized and assayed in duplicate. Median fluorescence  
178 intensities (MFI) of each analyte-specific immunoassay bead set were detected by the flow- and  
179 fluorescence-based Luminex 200™ detection platform (Luminex Corporation, Austin, TX).<sup>21</sup>  
180 Data were processed using a quality control (QC) algorithm that calibrates performance of an  
181 expanded set of serial standard curves and an in-house plasma control run on every assay plate,  
182 monitoring intra- and inter-plate covariance (CV) and bead counts. Only plates with mean intra-  
183 assay %CV <15% were accepted. Samples failing to meet QC criteria were designated for re-run  
184 when feasible (%CVs >25%, bead counts <30). MFI values exceeding machine limits of reliable  
185 detection (>25,000) were excluded. Because interpolated concentrations can introduce bias for  
186 samples with very low or high values in relation to the serial standard curves, averaged MFI  
187 values for all 60 cytokines were used in the final statistical analyses rather than absolute  
188 concentrations.<sup>17,18</sup> The final data set (test samples) had mean intra-assay %CV of 4.6%  
189 (standard deviation [SD] 2.2%) and 0.5% of all possible intra-assay %CV values were >25%,  
190 across all cytokines. Per-cytokine intra-assay %CV values ranged from 1.9% to 7.9%.

191

## 192 **Statistical analyses**

193 Distributions of socio-demographic characteristics and vascular risk factors for the study  
194 cohort were calculated.

195 Association between cognitive outcomes and immune markers was assessed using a two-  
196 step hybrid Least Absolute Shrinkage and Selection Operator (LASSO) approach<sup>22</sup>: first, we



197 performed the LASSO technique to select a subset among the 60 immune markers (logarithm  
198 base 2-transformed and standardized) and all possible two-way interactions that linearly  
199 predicted each cognitive domain; variable selection was performed using 5-fold cross validation  
200 based on the sum of squared error criterion. Then associations of selected markers with cognitive  
201 function were assessed using linear regression models after adjusting for predictors of cognition  
202 (i.e., age, sex, education, race-ethnicity, education, insurance status, diabetes, smoking status,  
203 systolic blood pressure, diastolic blood pressure, high-density lipoprotein, low-density  
204 lipoprotein, and estimated glomerular filtration rate). The independent association of the immune  
205 marker ensemble was tested using likelihood ratio test (LRT) comparing two nested models: a  
206 model that included the traditional predictors only (M1), and a model that included the LASSO-  
207 selected markers and interactions in addition to the traditional predictors (M2). R-squared ( $R^2$ )  
208 was used to quantify the improvement of variance in the cognitive function explained by the  
209 LASSO-selected immune marker ensemble. All analyses were performed using SAS version 9.4  
210 (SAS Institute Inc. Cary, NC) and R version 3.4.

211

## 212 **RESULTS**

### 213 *Description of cohort*

214 There were 1179 participants with immune marker data available (Table 1). Mean age  
215 was  $70 \pm 8.9$  years and 60% were women. There was a high proportion of Hispanics (68%); mean  
216 education level was  $10 \pm 5$  years. There was a high burden of diabetes (28%) and other  
217 cardiovascular risk factors.

218

### 219 *Associations of LASSO-selected immune markers with cognitive function*

220 Inclusion of LASSO-selected immune markers collectively improved model fit over age  
221 alone (p-value for LRT < 0.0001 for global score and for all domains) and over age,  
222 demographics including education, and traditional risk factors for each cognitive outcome (p-  
223 value < 0.0001 for global score, memory, language, and executive function:  $p = 0.0081$  for  
224 processing speed; Table 2). For global cognitive function, the variance in cognition explained by  
225 the immune markers was similar to that explained by age (model 0 and model 1-1), and the  
226 addition of immune markers to a model that included age alone led to almost a doubling of the  
227  $R^2$  (model 1-1 and model 1-2), implying that the effect of the immune markers was independent  
228 and comparable in size to that of the effect of age. The effect of age alone was greatest for the  
229 domain of processing speed ( $R^2 = 0.17$ ) and least for language ( $R^2 = 0.02$ ). The impact of adding  
230 immune markers to age was greatest for executive function, for which  $R^2$  increased from 0.04 for  
231 a model including only age to 0.17 when the immune markers were added.

232 Approximately 48% of the variance in global cognition was explained by a model  
233 containing age, other demographics, and risk factors; the model fit improved by approximately  
234 4.0% (from 48% to 50%) after inclusion of the immune markers.

235

### 236 *Specific immune markers predicting cognitive functions*

237 A subset of immune markers and their two-way interactions that predicted each cognitive  
238 function were selected using LASSO (Table e-2). C-C Motif Chemokine Ligand 11 (CCL11, or  
239 eotaxin), C-X-C Motif Chemokine Ligand 9 (CXCL9), hepatocyte growth factor (HGF) and  
240 serpin E1 (or plasminogen activator inhibitor-1) were consistently selected as being associated  
241 with overall cognitive function (Table 3) and with each of the neuropsychological domains (table  
242 e-3-6). In addition, sFasL, SCF, leptin, CCL3, CSF3 and CCL2 contributed to multiple cognitive

243 domains. Interactions between CCL5 and serpin E1, between CCL3 and TNF $\beta$ , between CCL11  
244 and IL1RA, between HGF and leptin, between TRAIL and IL12p40, between CCL11 and CCL5,  
245 and between CXCL10 and CXCL9 were also found in 2 or more domains.

246

### 247 *Magnitude of immune marker effects*

248 The magnitude of immune marker effects was comparable to that of conventional risk  
249 factors. For example, for executive function, each SD increase in CCL11 levels ( $\beta=-0.052$ ,  
250  $p=0.016$ ) was associated with an effect size equivalent to aging 3 years (3-year  $\beta=-0.048$ ,  
251  $p<0.0001$ ). HGF had twice the effect on memory function ( $\beta$  per SD= $-0.06$ ,  $p=0.012$ ) as aging ( $\beta$   
252 per year = $-0.03$ ,  $p<0.0001$ ).

253

### 254 **Discussion**

255 We found several immune molecules are cross-sectionally associated with cognitive  
256 function in a predominantly Hispanic, but ethnically diverse, population. Many immune markers  
257 were correlated, prompting us to use the LASSO technique to perform data reduction, thereby  
258 extracting those molecules that were independently and most informatively associated with  
259 cognition. As a group, those markers that were selected using LASSO had an explanatory impact  
260 comparable and independent to that of age. After accounting for sociodemographic and vascular  
261 risk factors, as well, the immune panel significantly improved model fit for the association with  
262 cognition by approximately 4%.

263 These results suggest that serum immune markers have an independent association with  
264 cognition beyond that due to traditional risk factors for cognition and vascular disease. While the  
265 collective magnitude of these markers on cognition was modest, the magnitude of association for

266 several markers was comparable to that of other well-accepted risk markers of cognitive  
267 impairment, including age. Cognitive decline is a complex, multifactorial phenomenon, and it is  
268 unlikely that any single risk factor, immune pathway or marker accounts for a substantial  
269 proportion of the variance in cognition. The total variance explained by models not including the  
270 immune panel did not exceed 50%. Our results suggest that several immune pathways may be  
271 involved and that approaches that affect multiple pathways simultaneously will be most likely to  
272 have an impact, although further research is needed.

273 Individual markers most consistently associated with cognition were the chemokines  
274 CCL11 and CXCL9, the neurotrophic factor HGF, and serpin E1. Chemokines are a large family  
275 of small protein molecules that play an important role in immune functions. CCL11 (eotaxin-1)  
276 primarily binds to the CCR3 receptor and is important in eosinophil recruitment, allergic  
277 responses, and skewing toward a T helper (Th)-2 immune response. Its levels increase with age,  
278 it can cross the blood brain barrier, and it has been postulated to promote aging-accelerated  
279 neurodegeneration.<sup>23,24,25</sup> CCL11 impairs post-stroke recovery in animal models, although the  
280 effect in humans appears to be reversed.<sup>26</sup>

281 CXCL9 is a member of the subfamily of CXC chemokines that lack a glutamic acid-  
282 leucine-arginine motif. They all share the CXCR3 receptor, and participate in Th1-type immune  
283 responses, involving tissue infiltration by T cells as part of the innate immune response. CXCL9  
284 is constitutively expressed on human brain-derived microvascular endothelial cells and  
285 astrocytes.<sup>27</sup> CXCL9 is upregulated by IFN- $\gamma$ , induces activation of extracellular signal-regulated  
286 kinases in cortical neurons in mice, and is involved in neuronal–glial interactions.<sup>28</sup> The CXC  
287 chemokines increase with inflammation and infection of the CNS,<sup>29</sup> and are also up-regulated in  
288 human brains with Alzheimer pathology.<sup>30</sup>

289 HGF is a neurotrophic factor with anti-apoptotic and angiogenesis effects that facilitates  
290 dendritic arborization and has been associated with small artery disease among patients with  
291 cognitive impairment and AD.<sup>31</sup> Consistent with our findings, these associations were  
292 independent of other vascular risk factors, suggesting that the mechanisms by which HGF  
293 contributes to cognitive impairment may be independent of traditional vascular risk factors. It is  
294 increasingly evident that vascular and neurodegenerative contributions to cognitive aging and  
295 dementia overlap, and that vascular mechanisms contribute to neurodegeneration. Immune  
296 mechanisms that lead to small vessel disease may thus enhance the degenerative pathways that  
297 lead to AD, either by impairing blood flow, enhancing inflammation, reducing regenerative  
298 capacity, or inhibiting amyloid clearance.

299 Serpin E1 is the major inhibitor of the serine proteases tissue plasminogen activator and  
300 urokinase, and thus acts as an inhibitor of fibrinolysis. Elevated levels potentially contribute to  
301 increased atherosclerosis, and risk of coronary artery events and stroke.<sup>32</sup> In addition, serpin E1  
302 inhibits activity of matrix metalloproteinases, which play a role in blood-brain barrier breakdown  
303 after ischemia.<sup>33</sup> Serpin E1 also plays a role in regulation of brain-derived neurotrophic factor  
304 (BDNF), which must be converted from a pro-protein by plasmin. BDNF plays an important role  
305 in neuronal activity and memory.<sup>34</sup> A small study showed that serpin E1 is elevated in peripheral  
306 blood with mild cognitive impairment;<sup>35</sup> however, our findings of higher levels of serpin E1 in  
307 association with cognitive performance, and without interaction with BDNF, suggest that serpin  
308 E1 production may exert a small protective effect.

309 Associations of immune markers with cognition were present for each of the individual  
310 domains of cognitive function investigated, although several markers, as well as a global  
311 cognitive measure, were present across all areas. Other markers selected by our data reduction

312 technique as contributing to two or more individual cognitive domains included sFasL (memory,  
313 language function, processing speed, and global cognition), SCF (memory, processing speed, and  
314 global cognition), CSF2 (memory and processing speed), leptin (language, executive function,  
315 and global cognition), and the chemokines CCL2 (processing speed, executive function) and  
316 CCL3 (language, executive function, and global cognition).

317 Evidence that levels of the chemokines CCL2, CCL3, CCL11 and CXCL9 are associated  
318 with cognitive decline in our cohort support the hypothesis that the innate immune system  
319 contributes to cognitive impairment and dementia.<sup>36,37</sup> Recent studies provide evidence that  
320 increased amyloid-beta peptide activates the innate immune system via pattern recognition  
321 receptors on microglia and astrocytes, contributing to hyperphosphorylation of *tau*. Sterile  
322 inflammation can also be provoked by recognition of intracellular contents released from  
323 necrotic cells through damage-associated molecular patterns. Elevations of these chemokines  
324 could reflect chronic activation of innate immunity in brains of patients with cognitive  
325 impairment. There is also evidence that infections, such as herpes simplex virus-1, provoke  
326 innate immunity, cause *tau* phosphorylation, and contribute to neurodegeneration.<sup>38</sup> Previous  
327 studies in our cohort demonstrate that serologies against herpesviruses are associated with lower  
328 cognitive test scores.<sup>39,40</sup>

329 Our results could have clinical implications since inflammation is potentially modifiable.  
330 IL1 $\beta$  inhibition diminishes residual inflammatory risk for cardiovascular events,<sup>41,42</sup> and some  
331 antiviral agents are being tested for efficacy against AD, with variable results.<sup>43,44,45</sup>  
332 Acetylcholinesterase inhibitors also decreased IFN $\gamma$ , TNF $\alpha$ , IL1 $\beta$  and IL6 secretion by immune  
333 cells and enhanced innate resistance to viral infection *in vitro*.<sup>46</sup> Furthermore, the timing of

334 intervention also appears to be critical, underscoring the significance of long-term prospective  
335 investigations such as NOMAS.

336 Our study has limitations. First, measures of immune molecules and cognition were  
337 obtained at a single time point, limiting our ability to make causal determinations. We continue  
338 to follow our cohort over time, however, to provide longitudinal data. Second, immune markers  
339 were not assessed in the cerebrospinal fluid or brain tissue, the site where injury occurs.  
340 Nonetheless, blood biomarkers are increasingly recognized as indicators of neurodegenerative  
341 activity and predictors of AD. Third, though our panel included 60 different immune-related  
342 markers, many others were not included. Fourth, we did not include MRI-derived biomarkers in  
343 this study, nor did we have positron emission tomography to assess amyloid, *tau*, or microglial  
344 activations. Our outcomes, however, were cognitive test scores, which may reflect multiple  
345 pathologies and may ultimately have greater clinical relevance for patients. Our assay does not  
346 provide a clinically useful panel of markers for the prediction of dementia currently. Our  
347 findings require confirmation in other cohorts, and in longitudinal analyses, before they can be  
348 used for clinical purposes.

349 Our study also has strengths. Our cohort represents a racially and ethnically diverse,  
350 elderly cohort at highest risk for cognitive decline and dementia. Many prior studies have not  
351 included large numbers of Black and Hispanic/Latino people. Our population was also well-  
352 characterized for demographic and medical risk factors. Our multiplex immune assay included a  
353 large number of molecules that may contribute to cognitive decline and dementia.

354 In conclusion, peripheral blood levels of several immune-related molecules, representing  
355 pathways related to innate immunity, neural repair, and thrombosis, may play a role in cognitive  
356 decline and dementia. As a group these factors modestly contribute to cognitive impairment,

357 independently of vascular risk factors associated with cognitive decline. These results speak to  
358 the ability of a multiplex immune assay to add information regarding pathways that may be  
359 involved in neurodegeneration in a diverse population. These findings also indicate the need for  
360 further research on immune mechanisms in cognitive aging.

361



362 **Table 1. Characteristics of the Cohort**

363

|                                                     |                               | Overall             |
|-----------------------------------------------------|-------------------------------|---------------------|
|                                                     |                               | N=1179              |
| Age at visit 1, mean ( $\pm$ SD)                    |                               | 70 ( $\pm$ 8.9)     |
| Men, n (%)                                          |                               | 473 (40.1%)         |
| Years of Education, mean ( $\pm$ SD)                |                               | 9.7 ( $\pm$ 5.1)    |
| Race-ethnicity, n (%)                               | Hispanic                      | 785 (66.6%)         |
|                                                     | Non-Hispanic Black            | 198 (16.8%)         |
|                                                     | Non-Hispanic White            | 171 (14.5%)         |
| Medical Insurance, n (%)                            | Medicaid or no Insurance      | 560 (47.5%)         |
|                                                     | Medicare or Private Insurance | 619 (52.5%)         |
| Current Smokers, n (%)                              |                               | 182 (15.4%)         |
| Moderate or Heavy Physical Activity, n (%)          |                               | 119 (10.2%)         |
| Diabetes, n (%)                                     |                               | 324 (27.5%)         |
| Systolic blood pressure in mm Hg, mean ( $\pm$ SD)  |                               | 137 ( $\pm$ 17.6)   |
| Diastolic blood pressure in mm Hg, mean ( $\pm$ SD) |                               | 78 ( $\pm$ 9.6)     |
| High-density lipoprotein, mg/dl, mean ( $\pm$ SD)   |                               | 53.3 ( $\pm$ 16.9)  |
| Low-density lipoprotein, mg/dl, mean ( $\pm$ SD)    |                               | 115.6 ( $\pm$ 35.1) |
| eGFR, mean ( $\pm$ SD)                              |                               | 73.6 ( $\pm$ 18.0)  |

364 SD=standard deviation; eGFR=estimated glomerular filtration rate

365

366

367

368

369

370

371

372 **Table 2. Impact of immune markers and other factors on explanatory models for cognitive**  
 373 **test scores**

374  
 375

| Cognitive function | Adjusted R <sup>2</sup> values for models containing the listed variables |           |                                      |                         |                                                        |
|--------------------|---------------------------------------------------------------------------|-----------|--------------------------------------|-------------------------|--------------------------------------------------------|
|                    | Model 0                                                                   | Model 1-1 | Model 2-1                            | Model 1-2               | Model 2-2                                              |
|                    | Immune markers* only                                                      | Age only  | Age, demographics and risk factors** | Immune markers* and age | Immune markers*, age, demographics, and risk factors** |
| Global Score       | 0.13                                                                      | 0.12      | 0.48                                 | 0.21 <sup>†</sup>       | 0.50 <sup>¥</sup>                                      |
| Cognitive Domains  |                                                                           |           |                                      |                         |                                                        |
| Memory             | 0.12                                                                      | 0.11      | 0.31                                 | 0.18 <sup>†</sup>       | 0.33 <sup>¥</sup>                                      |
| Language           | 0.09                                                                      | 0.02      | 0.39                                 | 0.10 <sup>†</sup>       | 0.41 <sup>¥</sup>                                      |
| Processing Speed   | 0.11                                                                      | 0.17      | 0.31                                 | 0.22 <sup>†</sup>       | 0.32 <sup>¥¥</sup>                                     |
| Executive Function | 0.14                                                                      | 0.04      | 0.39                                 | 0.17 <sup>†</sup>       | 0.42 <sup>¥</sup>                                      |

376  
 377  
 378  
 379  
 380  
 381  
 382  
 383  
 384  
 385  
 386  
 387  
 388  
 389  
 390  
 391  
 392  
 393  
 394  
 395  
 396  
 397  
 398  
 399

\* Immune markers refers to those immune markers and their interactions that were selected from the Least Absolute Shrinkage and Selection Operator (LASSO) procedure as described in Methods.

\*\* Demographics and risk factors: Sex, race-ethnicity, education, medical insurance type, diabetes, smoking status, systolic blood pressure, diastolic blood pressure, high-density lipoprotein, low-density lipoprotein, estimated glomerular filtration rate

<sup>†</sup> p<0.0001 for likelihood ratio test for effect of addition of immune markers selected by LASSO to model adjusted only for age (comparing Model 1-1 and Model 1-2)

<sup>¥</sup> p<0.0001 for likelihood ratio test for effect of addition of immune markers selected by LASSO to model adjusted for age, demographics and risk factors (comparing Model 2-1 and Model 2-2)

<sup>¥¥</sup> p=0.0081 for likelihood ratio test for effect of addition of immune markers selected by LASSO to model adjusted for age, demographics and risk factors (comparing Model 2-1 and Model 2-2)

400

401

402 **Table 3: Association of immune markers and interactions with global cognitive score\***

403

| Immune marker <sup>†</sup> | Estimate | Standard Error | p     |
|----------------------------|----------|----------------|-------|
| CCL11                      | -0.036   | 0.017          | 0.033 |
| HGF                        | -0.066   | 0.020          | 0.001 |
| CXCL9                      | -0.029   | 0.017          | 0.092 |
| SCF                        | -0.008   | 0.018          | 0.669 |
| Leptin                     | 0.027    | 0.019          | 0.160 |
| sFasL                      | 0.043    | 0.018          | 0.015 |
| CCL3                       | 0.024    | 0.019          | 0.193 |
| Serpin_E1                  | 0.037    | 0.016          | 0.022 |
| Serpin_E1*CCL5             | -0.021   | 0.014          | 0.123 |
| HGF*Leptin                 | -0.036   | 0.017          | 0.031 |
| CCL11*IL1RA                | -0.008   | 0.012          | 0.485 |
| CCL11*SCF                  | -0.033   | 0.015          | 0.025 |
| sFasL*PDGFBB               | -0.030   | 0.015          | 0.042 |
| CCL5*CCL4                  | -0.001   | 0.020          | 0.962 |
| CCL4*VCAM1                 | -0.029   | 0.022          | 0.186 |
| CXCL10*IFN $\beta$         | 0.009    | 0.031          | 0.761 |
| HGF*TRAIL                  | 0.014    | 0.017          | 0.411 |
| CXCL10*TGFa                | 0.011    | 0.035          | 0.745 |
| CCL3*TNF $\beta$           | 0.007    | 0.014          | 0.599 |
| TRAIL*IL12p40              | 0.025    | 0.019          | 0.179 |
| CXCL10*IL5                 | -0.010   | 0.021          | 0.643 |
| CCL3*LIF                   | -0.006   | 0.003          | 0.670 |
| CCL11*sICAM1               | 0.020    | 0.017          | 0.243 |
| CXCL10*VEGFD               | 0.013    | 0.016          | 0.432 |

404

405 \* Adjusted for age, sex, race-ethnicity, education, medical insurance type, diabetes, smoking  
 406 status, systolic blood pressure, diastolic blood pressure, high-density lipoprotein, low-density  
 407 lipoprotein, estimated glomerular filtration rate<sup>‡</sup> Immune markers were log 2 transformed and  
 408 standardized

409

410 CCL11 = C-C Motif Chemokine Ligand 11; CXCL9 = C-X-C Motif Chemokine Ligand 9;  
 411 HGF = hepatocyte growth factor; sFasL = soluble Fas ligand; SCF = stem cell factor;  
 412 CSF2 = Colony stimulating factor 2; CCL2 = C-C Motif Chemokine Ligand 2;  
 413 CCL3 = C-C Motif Chemokine Ligand 3; CCL4 = C-C Motif Chemokine 4;  
 414 IL12p40 = interleukin-12 p40; IL21 = interleukin 21; IL1a = interleukin 1a; CCL4 = C-C Motif  
 415 Chemokine Ligand 4; IFN $\beta$  = interferon beta; PDGFBB = Platelet derived growth factor-BB;  
 416 TGFa = transforming growth factor  $\alpha$ ; TRAIL = Tumor necrosis factor-related apoptosis-  
 417 inducing ligand

418

419

420

421

422

423

424 References

---

- <sup>1</sup> Schwartz M, Peralta Ramos JM, Ben-Yehuda H. A 20-Year Journey from Axonal Injury to Neurodegenerative Diseases and the Prospect of Immunotherapy for Combating Alzheimer's Disease. *Journal of immunology (Baltimore, Md : 1950)* 2020;204:243-50.
- <sup>2</sup> Esenwa CC, Elkind MS. Inflammatory risk factors, biomarkers and associated therapy in ischaemic stroke. *Nat Rev Neurol* 2016;12:594-604.
- <sup>3</sup> Novellino F, Saccà V, Donato A, et al. Innate Immunity: A Common Denominator between Neurodegenerative and Neuropsychiatric Diseases. *International journal of molecular sciences* 2020;21.
- <sup>4</sup> Itzhaki RF, Golde TE, Heneka MT, Readhead B. Do infections have a role in the pathogenesis of Alzheimer disease? *Nature reviews Neurology* 2020;16:193-7.
- <sup>5</sup> Park JC, Han SH, Mook-Jung I. Peripheral inflammatory biomarkers in Alzheimer's disease: a brief review. *BMB reports* 2020;53:10-9.
- <sup>6</sup> Bostancıoğlu M. An update on the interactions between Alzheimer's disease, autophagy and inflammation. *Gene* 2019;705:157-66.
- <sup>7</sup> Forrester SN, Gallo JJ, Whitfield KE, Thorpe RJ. A Framework of Minority Stress: From Physiological Manifestations to Cognitive Outcomes. *The Gerontologist* 2019;59:1017-23.
- <sup>8</sup> Daulatzai MA. Role of stress, depression, and aging in cognitive decline and Alzheimer's disease. *Current topics in behavioral neurosciences* 2014;18:265-96.

---

<sup>9</sup> Amariglio RE, Buckley RF, Rabin JS, et al. Examining Cognitive Decline Across Black and White Participants in the Harvard Aging Brain Study. *Journal of Alzheimer's disease : JAD* 2020;75:1437-46.

<sup>10</sup> Rosenberg GA. Extracellular matrix inflammation in vascular cognitive impairment and dementia. *Clinical science (London, England : 1979)* 2017;131:425-37.

<sup>11</sup> Fu Y, Yan Y. Emerging Role of Immunity in Cerebral Small Vessel Disease. *Front Immunol* 2018;9:67.

<sup>12</sup> Noz MP, Ter Telgte A, Wiegertjes K, et al. Trained Immunity Characteristics Are Associated With Progressive Cerebral Small Vessel Disease. *Stroke* 2018;49:2910-7.

<sup>13</sup> Poggesi A, Pasi M, Pescini F, Pantoni L, Inzitari D. Circulating biologic markers of endothelial dysfunction in cerebral small vessel disease: A review. *J Cereb Blood Flow Metab* 2016;36:72-94.

<sup>14</sup> Wright CB, Moon YP, Paik MC, Brown TR, Rabbani LR, Yoshita M, DeCarli C, Sacco RL, Elkind MSV. Inflammatory Biomarkers of Vascular Risk as Correlates of Leukoariosis. *Stroke* 2009;40:3466-71.

<sup>15</sup> Wright CB, Gardener H, Dong C, Yoshita M, DeCarli C, Sacco RL, Stern Y, Elkind MS. Infectious Burden and Cognitive Decline in the Northern Manhattan Study. *J Am Geriatr Soc*. 2015 Aug;63(8):1540-5.

<sup>16</sup> Siedlecki KL, Rundek T, Elkind MSV, Sacco RL, Stern Y, Wright CB. Using contextual analyses to examine the meaning of neuropsychological variables across samples of English-speaking and Spanish-speaking older adults. *J Int Neuropsychol Soc* 2011;12:1-11.

- 
- <sup>17</sup> Breen EJ, Tan W, Khan A. The Statistical Value of Raw Fluorescence Signal in Luminex xMAP Based Multiplex Immunoassays. *Sci Rep*. 2016;6:26996.
- <sup>18</sup> Breen EJ, Polaskova V, Khan A. Bead-based multiplex immuno-assays for cytokines, chemokines, growth factors and other analytes: median fluorescence intensities versus their derived absolute concentration values for statistical analysis. *Cytokine*. 2015;71:188-98.
- <sup>19</sup> Hornig M, Montoya JG, Klimas NG, et al. Distinct plasma immune signatures in ME/CFS are present early in the course of illness. *Sci Adv* 2015;1:e1400121.
- <sup>20</sup> Hornig M, Gottschalk G, Peterson DL, et al. Cytokine network analysis of cerebrospinal fluid in myalgic encephalomyelitis/chronic fatigue syndrome. *Mol Psychiatry* 2016;21:261-9.
- <sup>21</sup> Vignali DA. Multiplexed particle-based flow cytometric assays. *J Immunol Methods* 2000;243:243-55.
- <sup>22</sup> Efron B, Hastie T, Johnstone I, Tibshirani R. Least angle regression. *Ann Statist* 2004;32(2):407-499.
- <sup>23</sup> Teixeira AL, Gama CS, Rocha NP, Teixeira MM. Revisiting the Role of Eotaxin-1/CCL11 in Psychiatric Disorders. *Front Psychiatry*. 2018 Jun 14;9:241.
- <sup>24</sup> Villeda SA, Luo J, Mosher KI, Zou B, Britschgi M, Bieri G, et al. The ageing systemic milieu negatively regulates neurogenesis and cognitive function. *Nature*. 2011;477 (7362): 90–4.
- <sup>25</sup> Araçulı B, Horiuchi H, Mizuno T, Takeuchi H, Suzumura A. CCL11 enhances excitotoxic neuronal death by producing reactive oxygen species in microglia. *Glia* 2015;63:2274–84.

- 
- <sup>26</sup> Roy-O'Reilly M, Ritzel RM, Conway SE, Staff I, Fortunato G, McCullough LD. CCL11 (Eotaxin-1) Levels Predict Long-Term Functional Outcomes in Patients Following Ischemic Stroke. *Transl Stroke Res.* 2017;8(6):578-584.
- <sup>27</sup> Müller M, Carter S, Hofer MJ, Campbell IL. Review: The chemokine receptor CXCR3 and its ligands CXCL9, CXCL10, and CXCL11 in neuroimmunity – a tale of conflict and conundrum. *Neuropathol Appl Neurobiol.* 2010;36(5):368–387.
- <sup>28</sup> Xia MQ, Bacskai BJ, Knowles RB, Qin SX, Hyman BT. Expression of the chemokine receptor CXCR3 on neurons and the elevated expression of its ligand IP-10 in reactive astrocytes: In vitro ERK1/2 activation and role in Alzheimer's disease. *J Neuroimmunol.* 2000;108(1–2):227–235.
- <sup>29</sup> Watson AES, Goodkey K, Footz T, Voronova A. Regulation of CNS precursor function by neuronal chemokines. *Neurosci Lett.* 2020;715:134533.
- <sup>30</sup> Galimberti D, Schoonenboom N, Scarpini E, Scheltens P; Dutch-Italian Alzheimer Research Group. Chemokines in serum and cerebrospinal fluid of Alzheimer's disease patients. *Ann Neurol.* 2003;53(4):547–548.
- <sup>31</sup> Zhu Y, Hilal S, Chai YL, et al. Serum Hepatocyte Growth Factor Is Associated with Small Vessel Disease in Alzheimer's Dementia. *Front Aging Neurosci.* 2018;10:8. Published 2018 Jan 23. doi:10.3389/fnagi.2018.00008
- <sup>32</sup> Liu Y, Cheng J, Guo X, Mo J, Gao B, Zhou H, Wu Y, Li Z. The roles of PAI-1 gene polymorphisms in atherosclerotic diseases: A systematic review and meta-analysis involving 149,908 subjects. *Gene.* 2018 Oct 5;673:167-173.



- 
- <sup>33</sup> Keric N, Maier GS, Samadani U, Kallenberg K, Dechent P, Brueck W, Heuer J, Rohde V. Tissue plasminogen activator induced delayed edema in experimental porcine intracranial hemorrhage: reduction with plasminogen activator inhibitor-1 administration. *Transl Stroke Res.* 2012 Jul;3(Suppl 1):88-93.
- <sup>34</sup> Angelucci F, Čechová K, Průša R, Hort J. Amyloid beta soluble forms and plasminogen activation system in Alzheimer's disease: Consequences on extracellular maturation of brain-derived neurotrophic factor and therapeutic implications. *CNS Neurosci Ther.* 2019;25:303-313.
- <sup>35</sup> Shen XN, Lu Y, Tan CTY, Liu LY, Yu JT, Feng L, Larbi A. Identification of inflammatory and vascular markers associated with mild cognitive impairment. *Aging (Albany NY).* 2019 Apr 30;11(8):2403-2419.
- <sup>36</sup> Heneka MT, Carson MJ, El Khoury J, Landreth GE, Brosseron F, Feinstein DL, Jacobs AH, Wyss-Coray T, Vitorica J, Ransohoff RM, et al. Neuroinflammation in Alzheimer's disease. *Lancet Neurol.* 2015 Apr;14(4):388-405
- <sup>37</sup> Salminen A, Ojala J, Kauppinen A, Kaarniranta K, Suuronen T. Inflammation in Alzheimer's disease: amyloid-beta oligomers trigger innate immunity defence via pattern recognition receptors. *Prog Neurobiol.* 2009;87(3):181-94.
- <sup>38</sup> Wozniak MA, Frost AL, Itzhaki RF. Alzheimer's disease-specific tau phosphorylation is induced by herpes simplex virus type 1. *J Alzheimers Dis.* 2009;16(2):341-350.
- <sup>39</sup> Katan M, Moon YP, Paik MC, Sacco RL, Wright CB, Elkind MS. Infectious burden and cognitive function: the Northern Manhattan Study. *Neurology.* 2013 Mar 26;80(13):1209-15. doi: 10.1212/WNL.0b013e3182896e79. PMID: 23530151; PMCID: PMC3691781.

- 
- <sup>40</sup> Zhao C, Strobino K, Moon YP, Cheung YK, Sacco RL, Stern Y, Elkind MSV. *APOE ε4* modifies the relationship between infectious burden and poor cognition. *Neurol Genet*. 2020 Jul 7;6(4):e462. doi: 10.1212/NXG.0000000000000462. PMID: 32754642; PMCID: PMC7357411.
- <sup>41</sup> Ridker PM, Everett BM, Thuren T, et al. Antiinflammatory Therapy with Canakinumab for Atherosclerotic Disease. *The New England journal of medicine* 2017;377:1119-31.
- <sup>42</sup> Ridker PM. Anticytokine Agents: Targeting Interleukin Signaling Pathways for the Treatment of Atherothrombosis. *Circulation research* 2019;124:437-50.
- <sup>43</sup> Ali MM, Ghouri RG, Ans AH, Akbar A, Toheed A. Recommendations for Anti-inflammatory Treatments in Alzheimer's Disease: A Comprehensive Review of the Literature. *Cureus* 2019;11:e4620.
- <sup>44</sup> Tzeng NS, Chung CH, Lin FH, et al. Anti-herpetic Medications and Reduced Risk of Dementia in Patients with Herpes Simplex Virus Infections-a Nationwide, Population-Based Cohort Study in Taiwan. *Neurotherapeutics : the journal of the American Society for Experimental NeuroTherapeutics* 2018;15:417-29.
- <sup>45</sup> Dominy SS, Lynch C, Ermini F, et al. *Porphyromonas gingivalis* in Alzheimer's disease brains: Evidence for disease causation and treatment with small-molecule inhibitors. *Science advances* 2019;5:eaau3333.
- <sup>46</sup> Kokras N, Stamouli E, Sotiropoulos I, et al. Acetyl Cholinesterase Inhibitors and Cell-Derived Peripheral Inflammatory Cytokines in Early Stages of Alzheimer's Disease. *Journal of clinical psychopharmacology* 2018;38:138-43.
